# Supplementary material
Source: PubMed Central journal article supplement (PMC7259116)
Supplement: NIHMS1584498-supplement-Supplemental_Tables.pdf [file NIHMS1584498-supplement-Supplemental_Tables.pdf]

Cell, Volume 176

## **Supplemental Information**

### **CCR5 Is a Therapeutic Target for Recovery after Stroke and Traumatic Brain Injury**

**Mary T. Joy, Einor Ben Assayag, Dalia Shabashov-Stone, Sigal Liraz-Zaltsman, Jose Mazzitelli, Marcela Arenas, Nora Abduljawad, Efrat Kliper, Amos D. Korczyn, Nikita S. Thareja, Efrat L. Kesner, Miou Zhou, Shan Huang, Tawnie K. Silva, Noomi Katz, Natan M. Bornstein, Alcino J. Silva, Esther Shohami, and S. Thomas Carmichael**

| <b>Number of patients</b> | <b>Non-carriers</b> | <b>CCR5-Δ32 heterozygosity</b> | <b>CCR5-Δ32 homozygosity</b> |
|---------------------------|---------------------|--------------------------------|------------------------------|
| 446 at admission          | 375 (84.1%)         | 67 (15%)                       | 4 (0.9%)                     |
| 396 at 1-year follow-up   | 328 (82.8%)         | 64 (16.2%)                     | 4 (1%)                       |

**Table S1. Related to Table 1:** Genotype data for patient cohorts

|                                               | <b>CCR5-Δ32 non-carriers</b> | <b>CCR5-Δ32 carriers</b> | <b>p</b> |
|-----------------------------------------------|------------------------------|--------------------------|----------|
| N                                             | 328                          | 68                       |          |
| Age, years (SD)                               | 66.7 (9.5)                   | 66.8 (9)                 | 0.093    |
| Male Gender, n (%)                            | 215 (65.5)                   | 37 (54.5)                | 0.025    |
| Education, years (SD)                         | 13.1 (3.5)                   | 14.9 (4.3)               | <0.001   |
| Body-mass index, kg/m <sup>2</sup> (SD)       | 26.9 (4.2)                   | 27.9 (3.8)               | 0.064    |
| Ethnicity, Ashkenazi, n (%)                   | 189 (57.6)                   | 61 (89.7)                | <0.001   |
| Admission Systolic blood pressure, mmHg (SD)  | 146.4 (22.8)                 | 151.7 (25.4)             | 0.087    |
| Current smokers, n (%)                        | 125 (38.1)                   | 30 (44.1)                | 0.339    |
| Diabetes mellitus, n (%)                      | 83 (25.3)                    | 21 (30.9)                | 0.329    |
| Dyslipidemia, n (%)                           | 172 (52.4)                   | 37 (54.4)                | 0.772    |
| Hypertension, n (%)                           | 189 (57.6)                   | 41 (60.3)                | 0.666    |
| Ischemic heart disease, n (%)                 | 52 (15.9)                    | 12 (17.6)                | 0.713    |
| Framingham Risk Score for Stroke              | 11.2 (5.5)                   | 12.4 (6)                 | 0.155    |
| APOE ε4 allele, n (%)                         | 62 (18.9)                    | 8 (11.8)                 | 0.166    |
| Admission NIHSS, (SD)                         | 2.9 (3)                      | 2.0 (0.3)                | 0.006    |
| <b>Brain MRI parameters</b>                   |                              |                          |          |
| Not performed MRI                             | 69 (21)                      | 12 (17.6)                | 0.528    |
| New lesion in MRI, n (%)                      | 157 (60.6)                   | 36 (64.3)                | 0.749    |
| <b>Infarct type</b>                           |                              |                          |          |
| Cortical infarct, n (%)                       | 54 (20.8)                    | 18 (32.1)                | 0.081    |
| Sub-cortical infarct, n (%)                   | 72 (27.8)                    | 12 (21.4)                | 0.194    |
| Subtentorial infarct, n (%)                   | 28 (10.8)                    | 5 (0.09)                 | 0.571    |
| Ischemic lesions volume, mm <sup>3</sup> (SD) | 4119.9 (9945.5)              | 7382.7 (13969.7)         | 0.286    |

**Table S2. Related to Table 1: Baseline characteristics at admission**

| Cognitive domain                     | Model 1 |       |       | Model 2 |       |       |
|--------------------------------------|---------|-------|-------|---------|-------|-------|
|                                      | $\beta$ | SE    | p     | $\beta$ | SE    | p     |
| Global cognitive score (Neurotrax)   | 0.100   | 1.761 | 0.057 | -0.270  | 1.548 | 0.029 |
| Memory score (Neurotrax)             | 0.108   | 2.197 | 0.040 | 0.113   | 2.123 | 0.026 |
| Executive function score (Neurotrax) | 0.046   | 1.753 | 0.386 | 0.049   | 1.691 | 0.342 |
| Visuo-spatial score (Neurotrax)      | -0.019  | 2.467 | 0.722 | 0.002   | 2.352 | 0.973 |
| Verbal function score                | 0.117   | 3.141 | 0.027 | 0.128   | 3.136 | 0.015 |
| Attention score (Neurotrax)          | 0.115   | 1.957 | 0.027 | 0.103   | 1.923 | 0.045 |
| MoCA score (Neurotrax)               | 0.108   | 0.517 | 0.036 | 0.084   | 0.462 | 0.070 |

**Table S3. Related to Table 1:** CCR5- $\Delta$ 32 allele in relation to cognitive domains 1 year post-stroke/TIA, unadjusted (model 1) and adjusted for age, gender and education (model 2). TIA, transient ischemic attack; MoCA, Montreal Cognitive Assessment. Significant results are shown in bold ( $p < 0.05$ ).

|                                               | CCR5-A32 non-carriers | CCR5-A32 carriers | p      |
|-----------------------------------------------|-----------------------|-------------------|--------|
| <b>Functional scores 3 months post-stroke</b> |                       |                   |        |
| N                                             | 314                   | 52                |        |
| SIS (strength) (SD)                           | 76.7 (27.9)           | 85.1 (23.7)       | 0.024  |
| SIS (hand function) (SD)                      | 81.1 (28.3)           | 87.3 (20.1)       | 0.061  |
| SIS (ADL) (SD)                                | 84.4 (22.1)           | 92.4 (14.9)       | 0.001  |
| SIS (mobility) (SD)                           | 79 (23.9)             | 85.3 (18.7)       | 0.034  |
| SIS (communication) (SD)                      | 92.6 (15.6)           | 96.7 (6.2)        | 0.001  |
| SIS (emotion) (SD)                            | 78.3 (24)             | 82.2 (20.3)       | 0.277  |
| SIS (participation) (SD)                      | 72.5 (30.8)           | 81.8 (24.9)       | 0.019  |
| SIS-16 (physical)                             | 80.1 (23.3)           | 86.2 (21.2)       | 0.081  |
| SIS (memory and thinking) (SD)                | 85.9 (19.5)           | 92.2 (16)         | 0.013  |
| FIM (total) (SD)                              | 119.8 (12)            | 122.4 (735)       | 0.042  |
| RNL (indoor mobility)                         | 1.2 (0.6)             | 1.0 (0.2)         | 0.025  |
| RNL (community mobility)                      | 1.9 (1.4)             | 1.6 (1.2)         | 0.174  |
| RNL (distance mobility)                       | 2.1 (1.5)             | 1.6 (1.2)         | 0.047  |
| RNL (daily living/self-care)                  | 1.2 (1.3)             | 1.7 (1.1)         | 0.197  |
| RNL (productivity)                            | 2.1 (1.4)             | 1.9 (1.4)         | 0.411  |
| RNL (recreation activities)                   | 2.7 (1.6)             | 2.0 (1.3)         | 0.004  |
| RNL (social activities)                       | 2.0 (1.3)             | 1.6 (1)           | 0.031  |
| RNL (family roles)                            | 1.8 (1.2)             | 1.7 (1.1)         | 0.709  |
| RNL (personal relationship)                   | 1.4 (0.8)             | 1.5 (0.8)         | 0.475  |
| RNL (presentation of self to others)          | 1.5 (0.9)             | 1.5 (0.9)         | 0.904  |
| RNL (general coping skills)                   | 1.9 (1.2)             | 1.7 (1.1)         | 0.215  |
| RNL Total score (SD)                          | 17.0 (12.1)           | 14.3 (11.1)       | 0.136  |
| SIS (memory and thinking) (SD)                | 31.9 (4.9)            | 32.6 (3.0)        | 0.114  |
| <b>Functional scores 6 months post-stroke</b> |                       |                   |        |
| N                                             | 338                   | 63                |        |
| SIS (strength) (SD)                           | 17.1 (4.3)            | 18.1 (2.8)        | 0.013  |
| SIS (hand function) (SD)                      | 22 (5.7)              | 23.9 (2.9)        | <0.001 |
| SIS (ADL) (SD)                                | 45.7 (8.6)            | 48.2 (4.8)        | 0.002  |
| SIS (mobility) (SD)                           | 39.1 (7.8)            | 41.1 (5.2)        | 0.011  |
| SIS (communication) (SD)                      | 33.5 (3.2)            | 33.7 (1.9)        | 0.776  |
| SIS (emotion) (SD)                            | 31.2 (4.6)            | 31.3 (2.4)        | 0.428  |
| SIS (participation) (SD)                      | 35.6 (7.5)            | 38.3 (3.5)        | <0.001 |
| SIS-16 (physical)                             | 80.9 (21.5)           | 87.5 (15.0)       | 0.004  |
| SIS (memory and thinking) (SD)                | 31.9 (4.9)            | 32.6 (3.0)        | 0.114  |
| RNL (indoor mobility)                         | 1.3 (0.8)             | 1.0 (0.2)         | <0.001 |
| RNL (community mobility)                      | 1.6 (1.2)             | 1.4 (1.1)         | 0.227  |
| RNL (distance mobility)                       | 1.7 (1.3)             | 1.4 (1.0)         | 0.056  |
| RNL (daily living/self-care)                  | 1.6 (1.1)             | 1.5 (0.9)         | 0.525  |
| RNL (productivity)                            | 1.7 (1.2)             | 1.5 (1)           | 0.167  |
| RNL (recreation activities)                   | 2.6 (1.7)             | 2.2 (1.6)         | 0.118  |
| RNL (social activities)                       | 1.8 (1.2)             | 1.4 (0.8)         | 0.002  |

|                                              |             |             |       |
|----------------------------------------------|-------------|-------------|-------|
| RNL (family roles)                           | 1.5 (1.0)   | 1.4 (0.9)   | 0.500 |
| RNL (personal relationship)                  | 1.4 (0.8)   | 1.3 (0.6)   | 0.444 |
| RNL (presentation of self to others)         | 1.4 (0.9)   | 1.4 (0.9)   | 0.917 |
| RNL (general coping skills)                  | 1.8 (1.2)   | 1.4 (0.8)   | 0.007 |
| RNL Total score (SD)                         | 18.2 (8.1)  | 15.9 (6.6)  | 0.067 |
| DEX (subjective) (SD)                        | 10 (9.6)    | 7.4 (6.4)   | 0.012 |
| DEX (family/caregiver) (SD)                  | 16.5 (13.0) | 16 (7)      | 0.944 |
| <b>Functional scores 1 year post-stroke</b>  |             |             |       |
| N                                            | 328         | 68          |       |
| SIS (strength) (SD)                          | 17.2 (4.1)  | 18.5 (3.1)  | 0.004 |
| SIS (hand function) (SD)                     | 22.2 (5.6)  | 23.9 (3.2)  | 0.001 |
| SIS (ADL) (SD)                               | 46.3 (8.6)  | 47.5 (6.0)  | 0.178 |
| SIS (mobility) (SD)                          | 40.1 (6.8)  | 41.2 (5.4)  | 0.224 |
| SIS (communication) (SD)                     | 33.5 (3.0)  | 34.1 (1.9)  | 0.069 |
| SIS (emotion) (SD)                           | 31.4 (3.4)  | 32 (3.9)    | 0.205 |
| SIS (participation) (SD)                     | 36.4 (7.1)  | 38.6 (3.6)  | 0.001 |
| SIS-16 (physical)                            | 82.5 (20.5) | 89.9 (15.0) | 0.001 |
| SIS (memory and thinking) (SD)               | 27.7 (4.9)  | 28.8 (1.8)  | 0.003 |
| RNL (indoor mobility)                        | 1.2 (0.6)   | 1.2 (0.5)   | 0.750 |
| RNL (community mobility)                     | 1.4 (1.0)   | 1.3 (0.7)   | 0.207 |
| RNL (distance mobility)                      | 1.5 (1.1)   | 1.5 (1.1)   | 0.768 |
| RNL (daily living/self-care)                 | 1.6 (1.1)   | 1.5 (0.8)   | 0.325 |
| RNL (productivity)                           | 1.6 (1.2)   | 1.4 (0.9)   | 0.117 |
| RNL (recreation activities)                  | 2.5 (1.6)   | 2.0 (1.4)   | 0.019 |
| RNL (social activities)                      | 1.7 (1.2)   | 1.3 (0.8)   | 0.004 |
| RNL (family roles)                           | 1.5 (1.1)   | 1.3 (0.8)   | 0.149 |
| RNL (personal relationship)                  | 1.4 (0.9)   | 1.3 (0.7)   | 0.300 |
| RNL (presentation of self to others)         | 1.4 (0.9)   | 1.4 (0.9)   | 0.872 |
| RNL (general coping skills)                  | 1.6 (1.1)   | 1.5 (0.9)   | 0.350 |
| RNL Total score (SD)                         | 17.1 (7.7)  | 15.6 (6.6)  | 0.206 |
| DEX (subjective) (SD)                        | 10.3 (10.5) | 7 (8.1)     | 0.012 |
| DEX (family/caregiver) (SD)                  | 19.1 (15.3) | 12.1 (15.1) | 0.249 |
| <b>Functional scores 2 years post-stroke</b> |             |             |       |
| N                                            | 285         | 49          |       |
| SIS (strength) (SD)                          | 17.2 (4.1)  | 17.3 ((4.5) | 0.887 |
| SIS (hand function) (SD)                     | 22.3 (5.3)  | 22.5 (5.5)  | 0.785 |
| SIS (ADL) (SD)                               | 46.9 (7.0)  | 47.1 (7.5)  | 0.808 |
| SIS (mobility) (SD)                          | 39.8 (6.6)  | 40.9 (6.7)  | 0.256 |
| SIS (communication) (SD)                     | 33.7 (2.5)  | 33.5 (2.2)  | 0.486 |
| SIS (emotion) (SD)                           | 30.9 (3.7)  | 31.4 (4.1)  | 0.402 |
| SIS (participation) (SD)                     | 36.4 (7.3)  | 38.6 (3.6)  | 0.703 |
| SIS-16 (physical)                            | 83.5 (19.9) | 87.7 (17.6) | 0.168 |
| SIS (memory and thinking) (SD)               | 31.4 (5.2)  | 32.3 (3.7)  | 0.148 |
| RNL (indoor mobility)                        | 1.1 (0.5)   | 1.1 (0.5)   | 0.749 |
| RNL (community mobility)                     | 1.4 (1.0)   | 1.5 (1.0)   | 0.840 |

|                                      |            |            |        |
|--------------------------------------|------------|------------|--------|
| RNL (distance mobility)              | 1.5 (1.2)  | 1.6 (1.3)  | 0.832  |
| RNL (daily living/self-care)         | 1.5 (1.0)  | 1.5 (1.0)  | 0.729  |
| RNL (productivity)                   | 1.6 (1.1)  | 1.7 (1.3)  | 0.613  |
| RNL (recreation activities)          | 2.4 (1.6)  | 2.1 (1.5)  | 0.214  |
| RNL (social activities)              | 1.7 (1.2)  | 1.4 (0.9)  | 0.020  |
| RNL (family roles)                   | 1.4 (1.0)  | 1.1 (0.4)  | <0.001 |
| RNL (personal relationship)          | 1.4 (0.8)  | 1.2 (0.7)  | 0.277  |
| RNL (presentation of self to others) | 1.3 (0.8)  | 1.2 (0.6)  | 0.582  |
| RNL (general coping skills)          | 1.6 (1.0)  | 1.4 (0.8)  | 0.075  |
| RNL Total score (SD)                 | 17.0 (7.5) | 15.6 (6.6) | 0.423  |

**Table S4. Related to Table 1:** Functional outcomes in CCR5-Δ32 carriers vs non-carriers. SD, standard deviation; SIS, stroke impact scale; DEX, BADS Dysexecutive Questionnaire; RNL, Reintegration to Normal Living Index. Entries are mean (SD) or n and %, as indicated. Significant results are shown in bold ( $p < 0.05$ ).
